# Supplementary material for: Clarification of acid site location in MSE-type zeolites by spectroscopic approaches combined with catalytic activity: comparison between UZM-35 and MCM-68
Source: Royal Society of Chemistry journal article supplement (doi:10.1039/d2cp00215a), 2022-01-01
Supplement: d2cp00215a1.pdf [file d2cp00215a1.pdf]

## *Electronic Supplementary Information*

### **Clarification of acid site location in MSE-type zeolites by spectroscopic approaches combined with catalytic activity: Comparison between UZM-35 and MCM-68**

Hiroto Toyoda,<sup>a, #</sup> Ryota Osuga,<sup>b, #</sup> Yong Wang,<sup>a</sup> Sungsik Park,<sup>a</sup> Koji Yazawa,<sup>c</sup> Hermann Gies,<sup>d, e</sup> Christopher J. Gilbert,<sup>f</sup> Bilge Yilmaz,<sup>f</sup> C.P. Kelkar,<sup>f</sup> and Toshiyuki Yokoi<sup>a, e\*</sup>

*a Institute for Innovative Research, Tokyo Institute of Technology, 4259 Nagatsuta, Midori-ku, Yokohama 226-8503, Japan*

*b Institute of Multidisciplinary Research for Advanced Materials, Tohoku University, 2-1-1 Katahira, Aoba-ku, Sendai, Miyagi 980-8577, Japan*

*c JEOL RESONANCE Inc., 3-1-2 Musashino, Akishima, Tokyo 196-8558, Japan*

*d Institute of Geology, Mineralogy und Geophysics, Ruhr-University Bochum, 44780 Bochum, Germany*

*e Tokyo Tech World Research Hub Initiative (WRHI), Institute of Innovative Research, Tokyo Institute of Technology, 4259 Nagatsuta, Midori-ku, Yokohama 226-8503, Japan*

*f R&D Refining Catalysts, BASF Corporation, 25 Middlesex-Essex Turnpike, Iselin, 08830 Iselin, USA*

#### **Author information**

#### **Corresponding Author**

\*E-mail; yokoi@cat.res.titech.ac.jp

Tel: +81 (0)45 924 5430

Notes: <sup>#</sup>These authors, H. Toyoda and R. Osuga contributed equally. The authors declare no competing financial interest.

## Calculating methods for conversion and selectivity.

The conversion and selectivity in the catalytic reactions were calculated by following equations Eq. S1 and S2,

$$\text{Conversion of substrate} = 1 - \frac{\text{amount of substrate (in reacted gas)}}{\text{amount of detected compounds (in reacted gas)}} \times 100 \quad (\text{Eq. S1})$$

$$\text{Product distribution} = \frac{\text{amount of the target product}}{\text{amount of detected products (in reacted gas)}} \times 100 \quad (\text{Eq. S2})$$

**Table S1** Physicochemical properties of control samples.

| Samples | Si/Al<br>(-) | $S_{\text{BET}}^{\text{a}}$<br>( $\text{m}^2 \text{g}^{-1}$ ) | $V_{\text{micro}}^{\text{b}}$<br>( $\text{cm}^3 \text{g}^{-1}$ ) | Number of acid sites <sup>c</sup><br>( $\text{mmol g}^{-1}$ ) |
|---------|--------------|---------------------------------------------------------------|------------------------------------------------------------------|---------------------------------------------------------------|
| ZSM-5   | 15           | 472                                                           | 0.17                                                             | 0.509                                                         |
| Beta    | 12.5         | 596                                                           | 0.23                                                             | 0.625                                                         |

<sup>a</sup>BET specific surface area. <sup>b</sup>Micropore volume. Determined by <sup>c</sup>NH<sub>3</sub>-TPD.

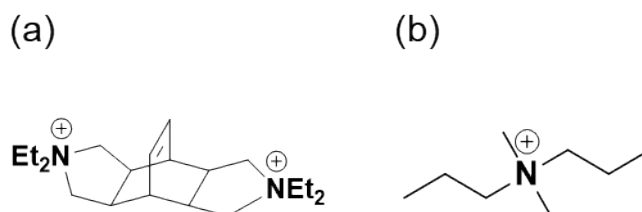

**Scheme S1** OSDAs used for synthesis of (a) MCM-68 and (b) UZM-35.

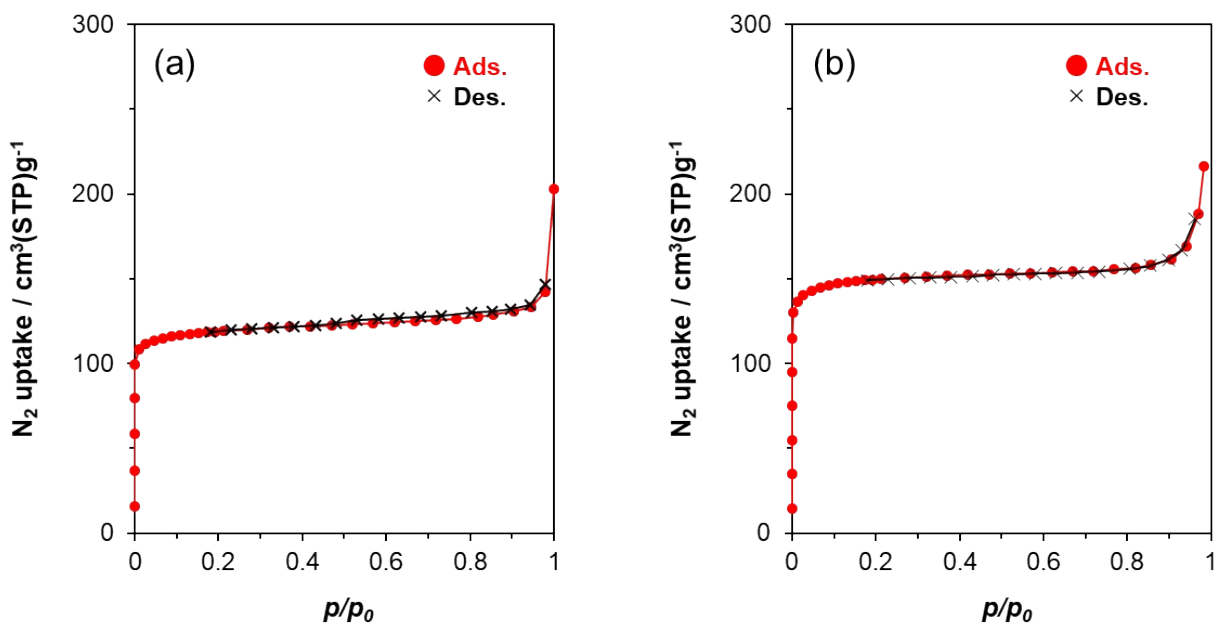

**Fig. S1**  $N_2$  adsorption-desorption isotherms of (a) UZM-35 and (b) MCM-68.

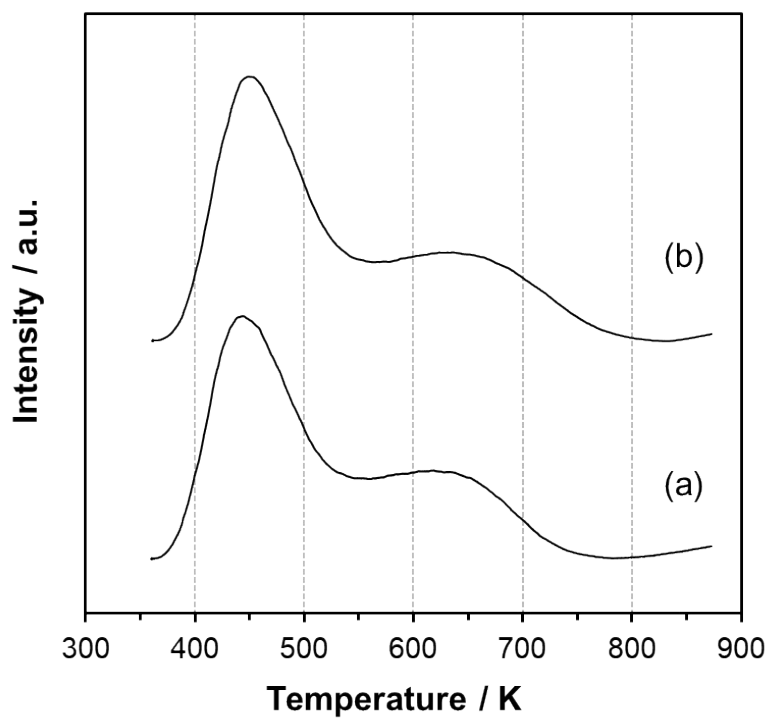

**Fig. S2**  $NH_3$ -TPD profiles of (a) UZM-35 and (b) MCM-68.

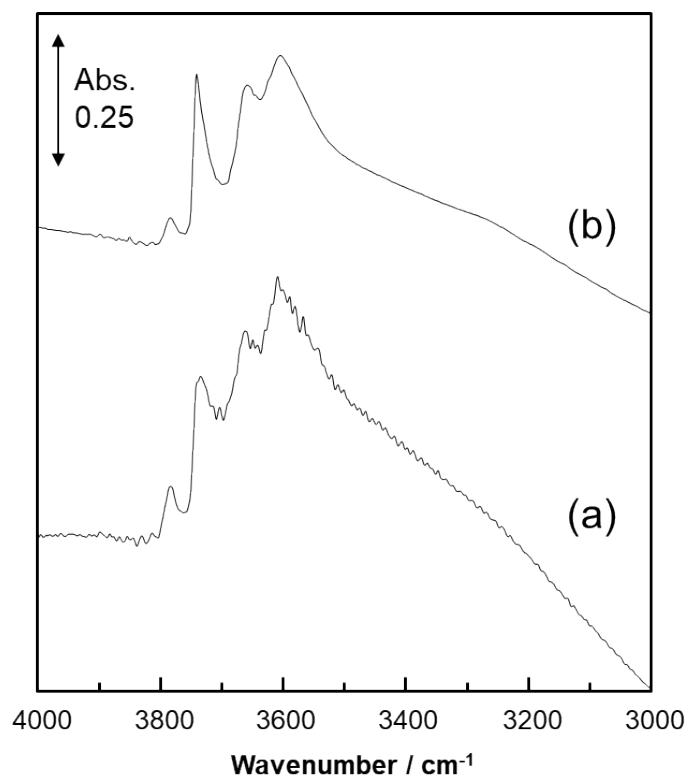

**Fig. S3** IR spectra of (a) UZM-35 and (b) MCM-68.

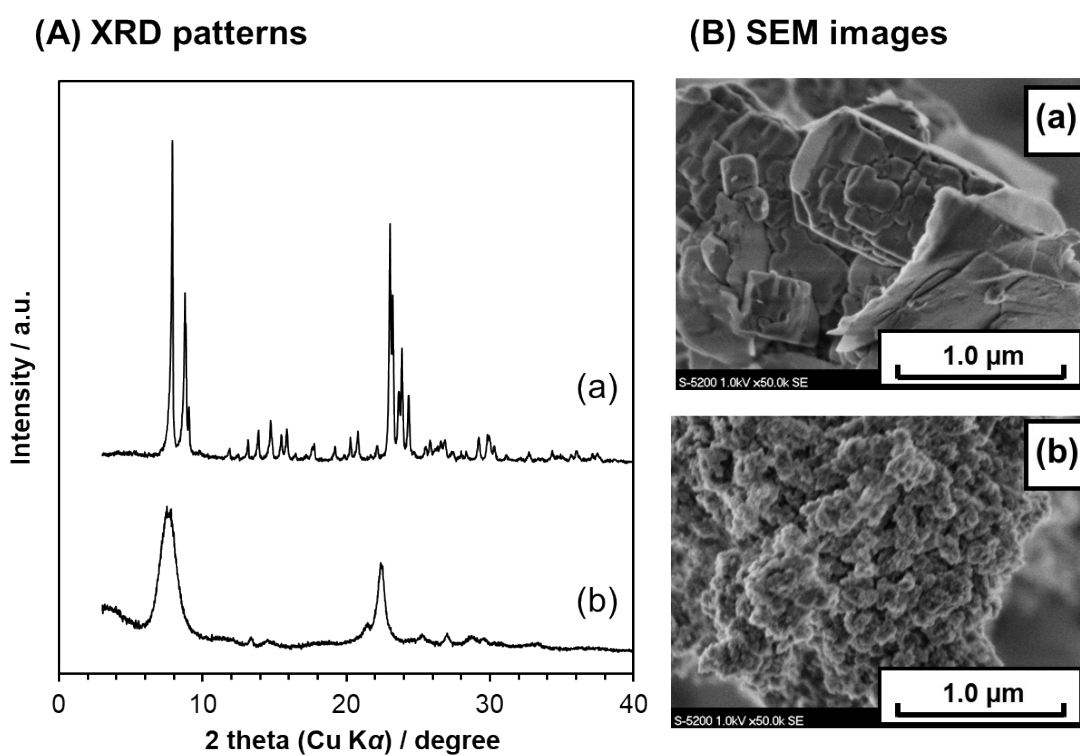

**Fig. S4** (A) XRD patterns and (B) SEM images of (a) ZSM-5 and (b) Beta.
